# Supplementary material
Source: PubMed Central journal article supplement (PMC3674393)
Supplement: cr201359x1.pdf [file cr201359x1.pdf]

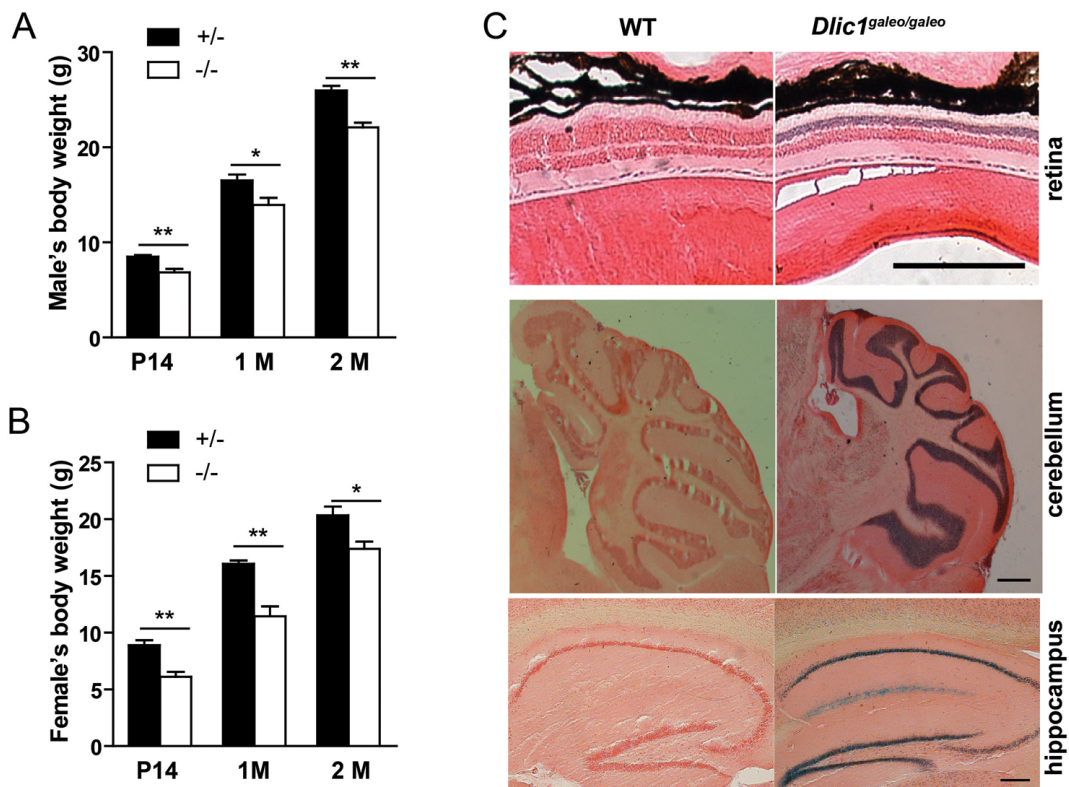

**Figure S1** (A and B) Statistical analysis of reduced body weight in both *Dlic1*<sup>-/-</sup> male (A) and female (B) mice. Body weight of the control and mutant mice at the indicated ages was measured. Values represent the means ± SEM of at least three mice. \*: P<0.05, \*\*: P<0.01. (C) Micrographs of X-gal-stained cryosections of retinas and brains from WT and *Dlic1<sup>galeo/galeo</sup>* mice, show that *Dlic1* is highly expressed in the ONL of retinas, the granule cells of cerebellum and the hippocampus. [Bar= 400 μm]
