# Supplementary material
Source: PubMed Central journal article supplement (PMC3674393)
Supplement: cr201359x2.pdf [file cr201359x2.pdf]

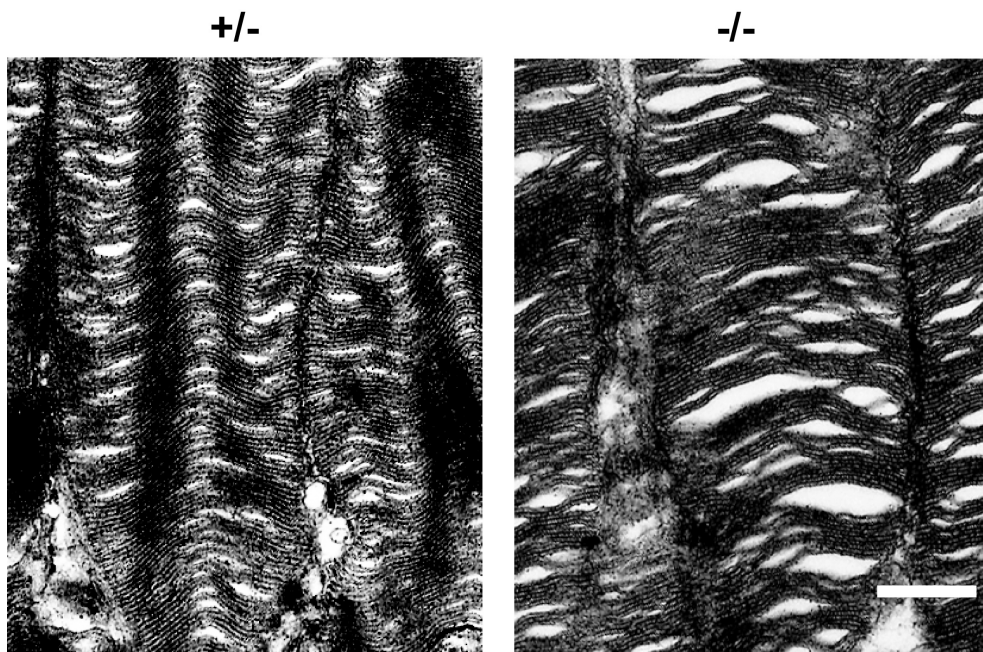

**Figure S2** Electron micrographs of outer segments of *Dlic1*<sup>+/-</sup> and *Dlic1*<sup>-/-</sup> photoreceptor cells show well packed disk membranes in both control and mutant OS. [Bar=250 nm]
