# Supplementary material
Source: PubMed Central journal article supplement (PMC3674393)
Supplement: cr201359x3.pdf [file cr201359x3.pdf]

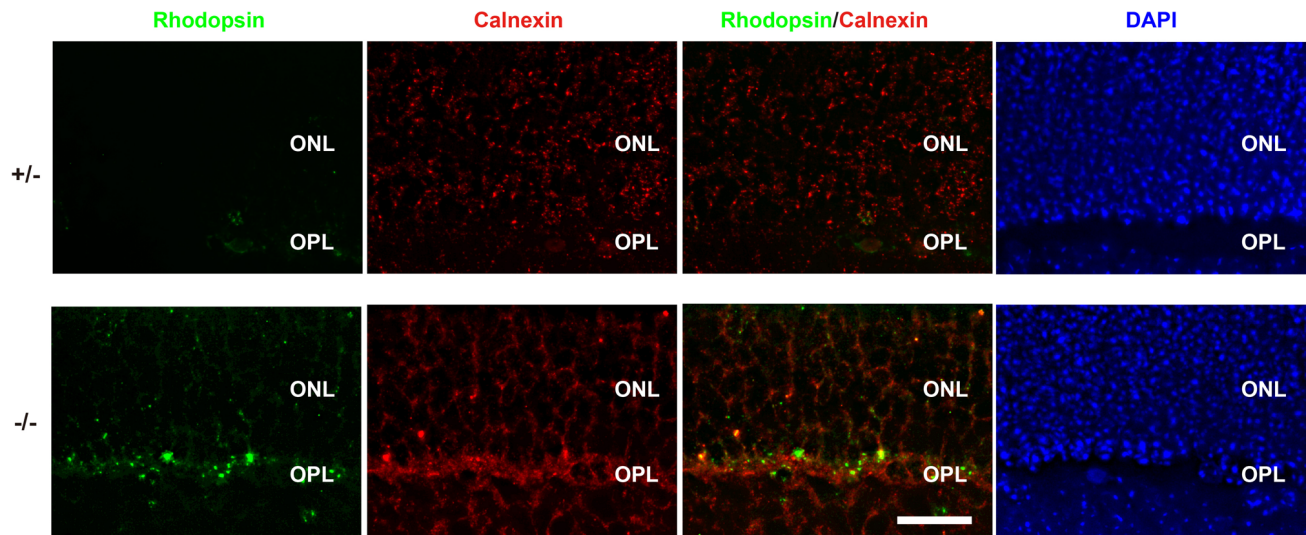

**Figure S3** Accumulation of rhodopsin in the ER of *Dlic1*<sup>-/-</sup> photoreceptor cells. Retina cryosections were co-stained with antibodies against rhodopsin and calnexin. The merged images show the colocalization of accumulated rhodopsin and calnexin, an ER marker. [Bar=20 $\mu$ m]
